# Supplementary material
Source: publisher site journal article supplement (https://www.dovepress.com/article/458749)
Supplement: Supplementary file 1 [file get_supplementary_file.php]

**NK cell mitochondrial membrane potential-associated model predicts outcomes in critically ill patients with COVID-19**

Supplementary Materials

## Table S1. Correlation analysis between clinical parameters and MMP MFI of NK cells among critical patients.

|  | **r** | **95% CI** | **p-value value** | **Summary** |
| --- | --- | --- | --- | --- |
| **PT** | -0.14 | -0.4252 to 0.1643 | 0.3600 | ns |
| **APTT** | -0.19 | -0.4641 to 0.1168 | 0.2217 | ns |
| **TT** | 0.09 | -0.2154 to 0.3807 | 0.5627 | ns |
| **INR** | -0.13 | -0.4113 to 0.1806 | 0.4184 | ns |
| **Fbg** | 0.28 | -0.01723 to 0.5389 | 0.0644 | ns |
| **D-Dimer** | 0.39 | 0.1013 to 0.6178 | 0.0098 | ** |
| **NT-proBNP** | -0.33 | -0.5674 to -0.01592 | 0.0399 | * |
| **hscTnI** | -0.22 | -0.4922 to 0.08855 | 0.1589 | ns |
| **CK** | -0.09 | -0.3911 to 0.2273 | 0.5781 | ns |
| **Myo** | -0.14 | -0.4437 to 0.1837 | 0.3869 | ns |
| **CRP** | -0.10 | -0.3890 to 0.2062 | 0.5218 | ns |
| **PCT** | 0.01 | -0.2997 to 0.3155 | 0.9569 | ns |
| **IL-6** | -0.03 | -0.3466 to 0.2923 | 0.8570 | ns |
| **IL-8** | -0.19 | -0.4871 to 0.1391 | 0.2507 | ns |
| **IL-10** | -0.13 | -0.4394 to 0.1981 | 0.4273 | ns |
| **TNF α** | -0.03 | -0.3597 to 0.3063 | 0.8641 | ns |

## Pearson’s correlation analysis was used for analyses.

## APTT: activated partial thromboplastin time, AUC: area under the curve, CK: creatine kinase, CRP: C-reactive protein, Fbg: fibrinogen, hscTnI: high-sensitivity cardiac troponin I, IL-10: interleukin 10, IL-6: interleukin 6, IL-8: interleukin 8, MFI: mean fluorescence intensity, MMP: mitochondrial membrane potential, myo: myoglobin, NK: natural killer, NT-proBNP: N-terminal pro-brain natriuretic peptide, PCT: procalcitonin, PT: prothrombin time, TNF: tumor necrosis factor.

## Table S2. Correlation analysis between clinical parameters and MMP MFI of NK cells in dead patients

|  | **r** | **95% CI** | **p-value** | **Summary** |
| --- | --- | --- | --- | --- |
| **PT** | 0.00 | -0.3823 to 0.3777 | 0.9895 | ns |
| **APTT** | -0.01 | -0.3872 to 0.3728 | 0.9667 | ns |
| **TT** | 0.10 | -0.2872 to 0.4657 | 0.6051 | ns |
| **INR** | 0.02 | -0.3622 to 0.3975 | 0.9186 | ns |
| **Fbg** | -0.02 | -0.3968 to 0.3629 | 0.9218 | ns |
| **D-Dimer** | 0.56 | 0.2310 to 0.7760 | 0.0023 | ** |
| **NT-proBNP** | -0.19 | -0.5297 to 0.2074 | 0.3492 | ns |
| **hscTnI** | -0.08 | -0.4445 to 0.3116 | 0.7003 | ns |
| **CK** | 0.03 | -0.3699 to 0.4198 | 0.8883 | ns |
| **Myo** | -0.02 | -0.4217 to 0.3848 | 0.9185 | ns |
| **CRP** | 0.08 | -0.3071 to 0.4485 | 0.6824 | ns |
| **PCT** | 0.07 | -0.3277 to 0.4440 | 0.7400 | ns |
| **IL-6** | -0.17 | -0.5400 to 0.2461 | 0.4144 | ns |
| **IL-8** | -0.16 | -0.5372 to 0.2695 | 0.4644 | ns |
| **IL-10** | -0.20 | -0.5691 to 0.2264 | 0.3483 | ns |
| **TNF α** | 0.24 | -0.2172 to 0.6064 | 0.3016 | ns |

## Pearson’s correlation analysis was used for analyses.

## APTT: activated partial thromboplastin time, AUC: area under the curve, CK: creatine kinase, CRP: C-reactive protein, Fbg: fibrinogen, hscTnI: high-sensitivity cardiac troponin I, IL-10: interleukin 10, IL-6: interleukin 6, IL-8: interleukin 8, MFI: mean fluorescence intensity, MMP: mitochondrial membrane potential, myo: myoglobin, NK: natural killer, NT-proBNP: N-terminal pro-brain natriuretic peptide, PCT: procalcitonin, PT: prothrombin time, TNF: tumor necrosis factor.


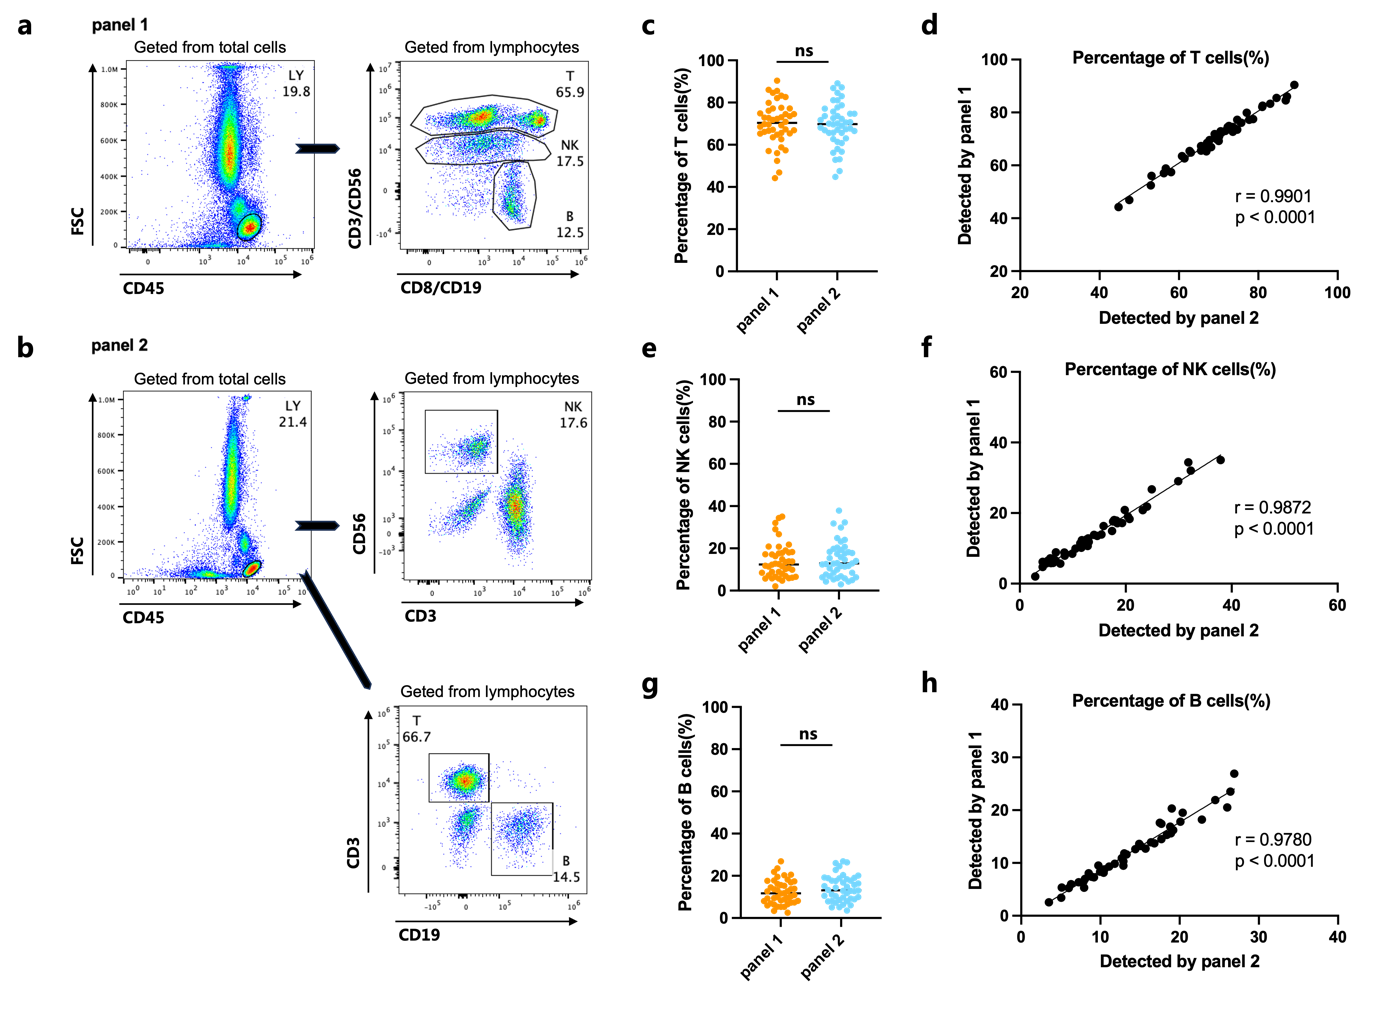


**Figure S1. Comparison of T, NK, and B cell subset detection results between two flow cytometry antibody panels.** (a) Gating strategy for the dual-antibody detection panel used in this study; (b) Gating strategy for the traditional single-antibody detection panel; (c) Comparison of T cell proportions between the two detection panels; (d) Correlation analysis of T cell proportions between the two detection panels; (e) Comparison of NK cell proportions between the two detection panels; (f) Correlation analysis of NK cell proportions between the two detection panels; (g) Comparison of B cell proportions between the two detection panels; (h) Correlation analysis of B cell proportions between the two detection panels. An unpaired t-test was used for comparison between the two groups, and Pearson correlation analysis was used to analyze correlations. Significant differences were defined as p < 0.05. ns indicates no significant statistical difference.


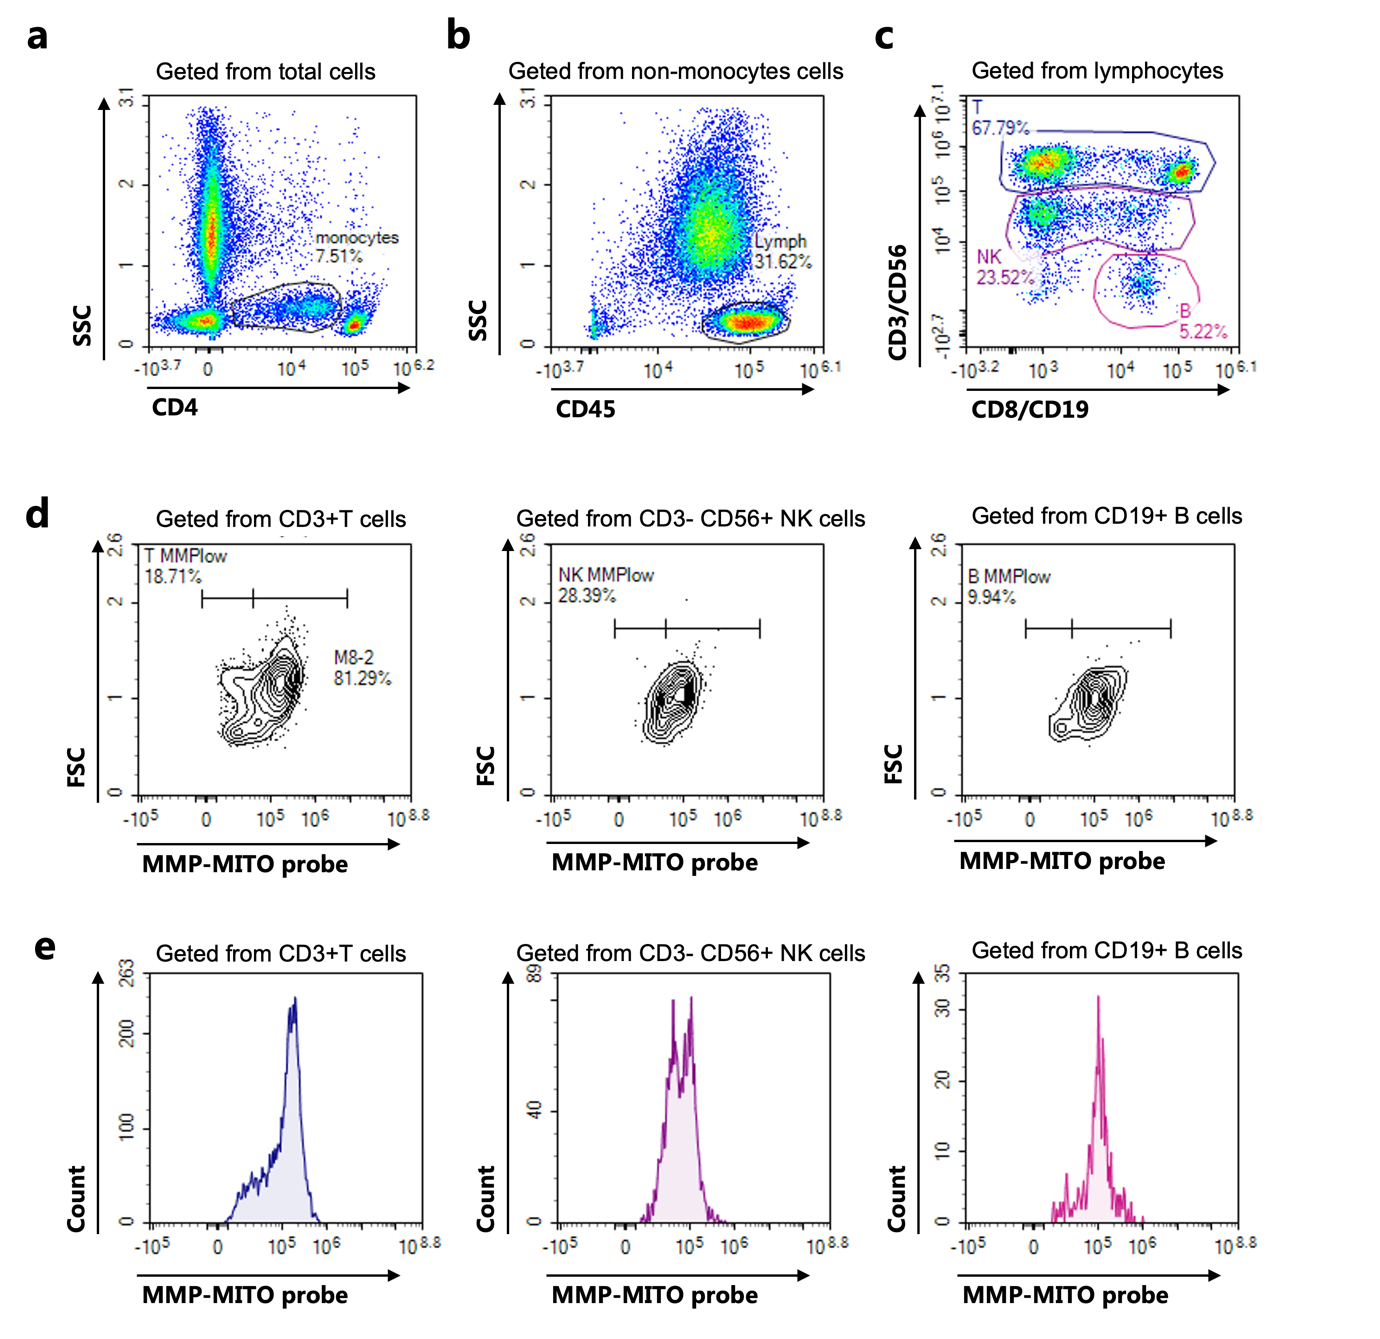


**Figure S2. Flow cytometry gating strategy for detecting MMP in lymphocyte subsets using MMP-MITO probes.** The gating strategy is as follows: (a) Monocytes are gated based on CD4 expression and SSC; (b) CD45+ lymphocytes are gated within non-monocytes PBMCs; (c) CD3/CD56/CD19 markers are used to identify CD3+ T cells, CD3-CD56+ NK cells, and CD3-CD19+ B cells; (d) MMPlow cell proportions are determined within CD3+ T cells, CD3-CD56+ NK cells, and CD3-CD19+ B cells based on FSC/MMP-MITO-probe characteristics; (e) Count/MMP-MITO-probe histograms are set up to determine the MMP MFI within CD3+ T cells, CD3-CD56+ NK cells, and CD3-CD19+ B cells**.**

**
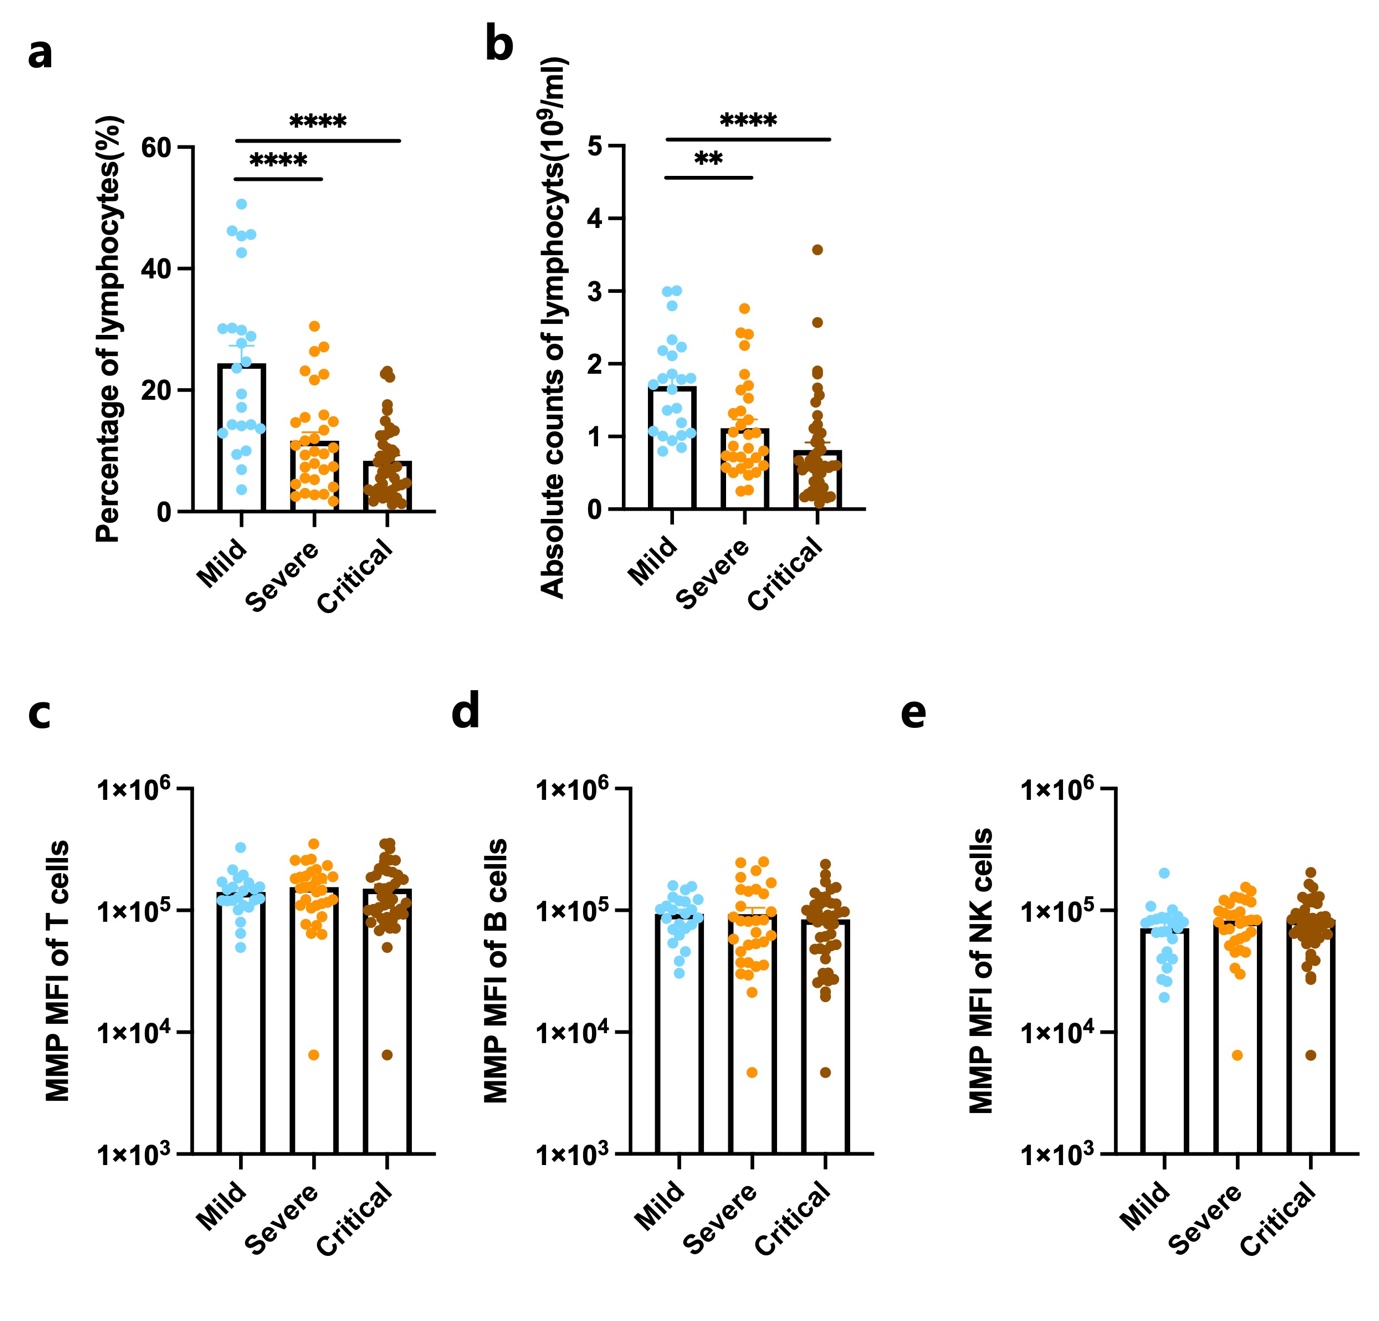
**

## Figure S3. Changes in lymphocyte subset proportions and MMP MFI in patients with mild, severe, and critical COVID-19. (a-b) Proportional (a) and absolute count (b) changes of peripheral blood lymphocytes, (c-e) Changes in the MMP MFI of T (c), B (d), and NK (e) lymphocyte subsets. Unpaired t-tests or Mann-Whitney U test were used for statistical analysis; **p < 0.01, ****p < 0.0001.


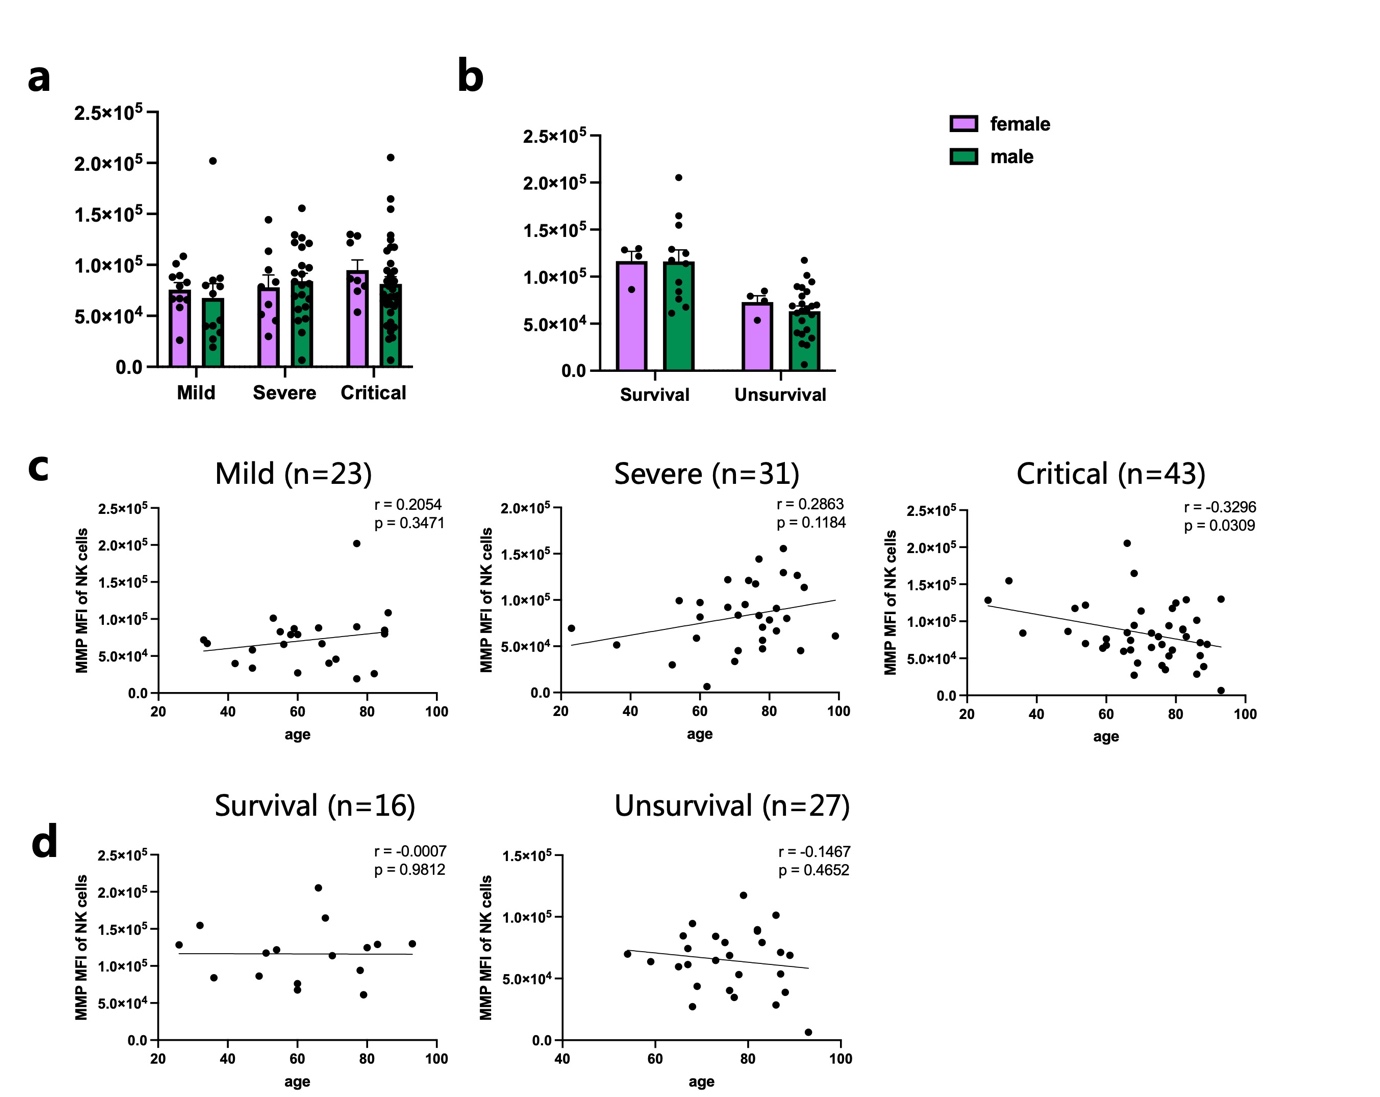


**Figure S4. Correlation between NK cell MMP MFI and age and sex in patients with different states.** (a) Comparison of male and female NK cell MMP MFI in mild, severe and critically ill patients; (b) Comparison of male and female NK cell MMP MFI in critically ill patients who survived and died; (c) Analysis of correlation between NK cell MMP MFI and age in mild, severe and critically ill patients; (d) Analysis of correlation between NK cell MMP MFI and age in critically ill patients who survived and died. Unpaired t-tests or Mann-Whitney U test was used in comparison between the two groups. Pearson correlation analysis is used to analyze correlations. Significant differences were defined as P < 0.05.

**
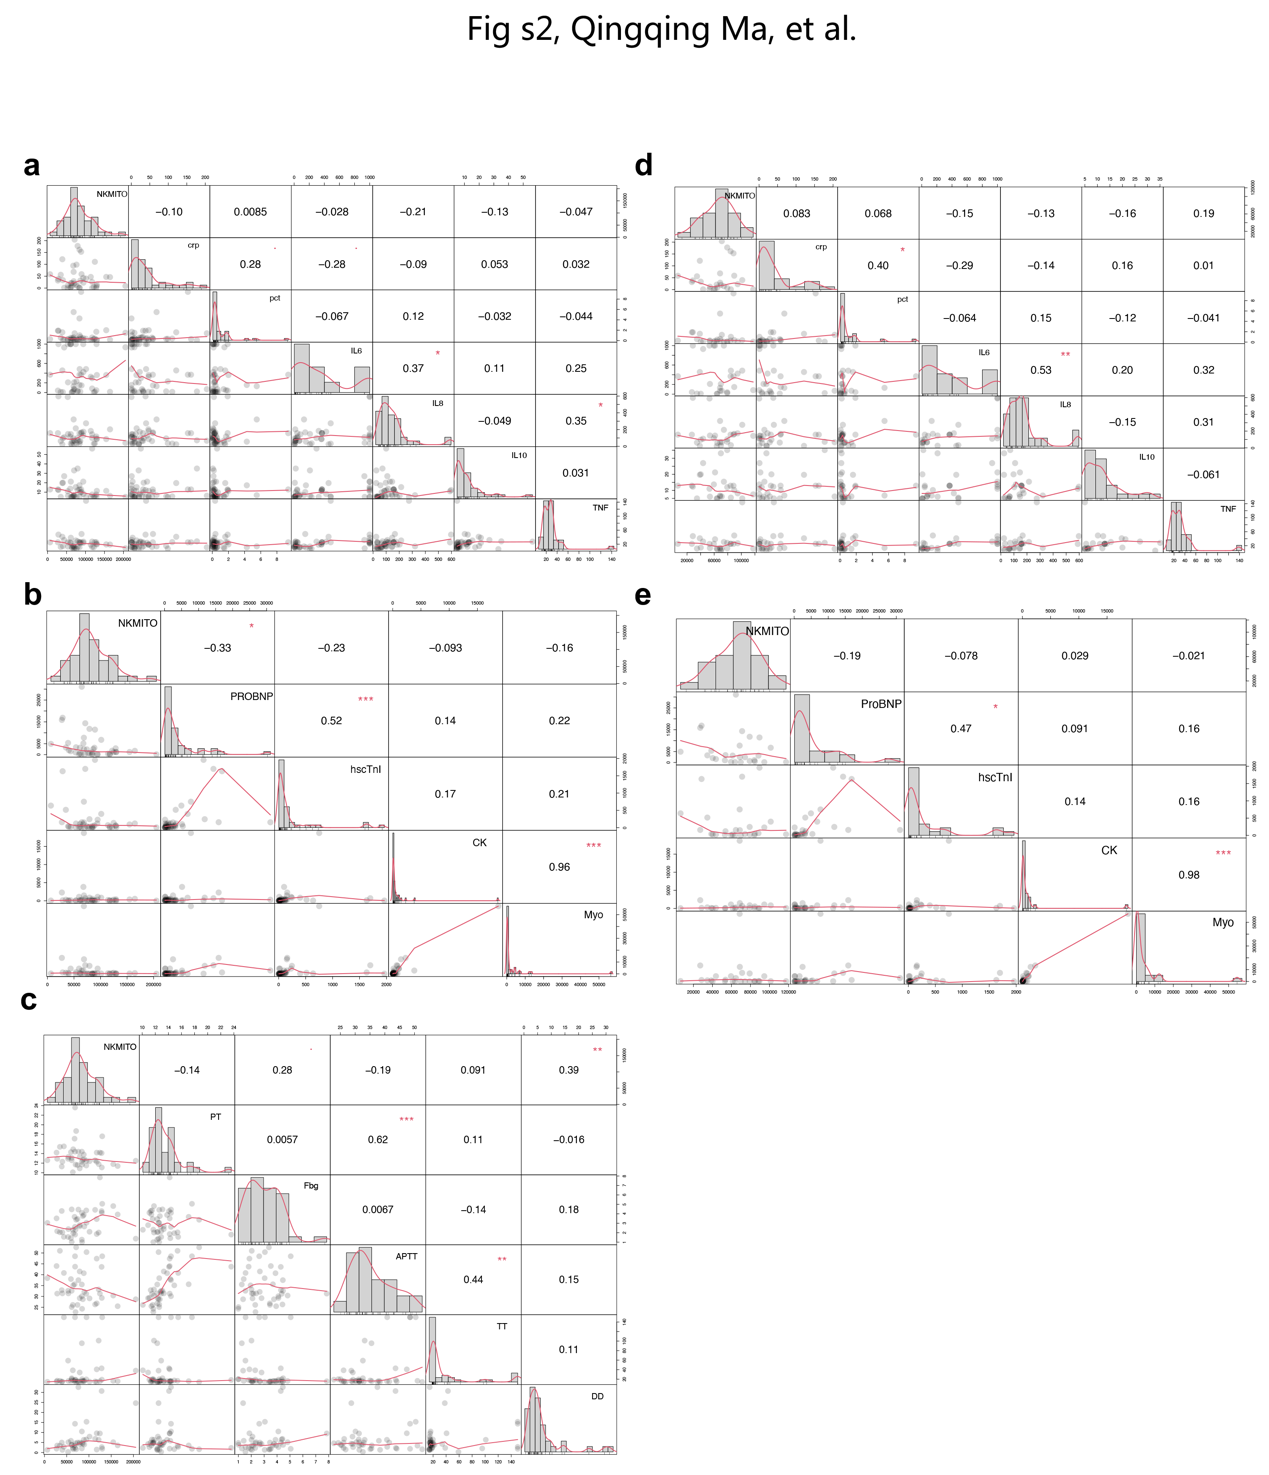
**

## Figure S5. Correlation analysis between NK cells MMP MFI and clinical parameters among critically ill and dead patients. (a-c) Pairwise correlation analysis between NK Cells MMP MFI and coagulation markers (a), myocardial injury markers (b), infection markers, and cytokines (c) among the overall critically ill patients. (d-e) Pairwise correlation analysis between NK Cells MMP MFI and myocardial injury markers (d), infection markers, and cytokines (e) in critically ill patients who died.
